## Document de principes

# L'hypothermie pour les nouveau-nés atteints d'encéphalopathie hypoxo-ischémique

Brigitte Lemyre, Vann Chau

Société canadienne de pédiatrie, comité d'étude du fœtus et du nouveau-né, Ottawa (Ontario)

**Correspondance :** Société canadienne de pédiatrie, 100-2305, boul. St. Laurent, Ottawa (Ontario) K1G 4J8

Courriel : [info@cps.ca](mailto:info@cps.ca); site Web : [www.cps.ca](http://www.cps.ca)

Les documents de principes et points de pratique de la Société canadienne de pédiatrie sont révisés régulièrement et modifiés au besoin. Consultez la page [www.cps.ca/fr/documents](http://www.cps.ca/fr/documents) du site Web de la SCP pour en obtenir la version la plus à jour. Les documents obsolètes sont retirés du site.

### Résumé

L'hypothermie thérapeutique est une norme de soins pour les nouveau-nés de 36 semaines d'âge gestationnel (AG) ou plus qui sont atteints d'encéphalopathie hypoxo-ischémique modérée à grave. Puisque certaines études incluaient des nouveau-nés de 35 semaines d'AG, il faut envisager l'hypothermie s'ils satisfont aux autres critères. Le refroidissement des nouveau-nés de moins de 35 semaines d'AG n'est pas recommandé. Dans les hôpitaux communautaires, il faut amorcer le refroidissement passif rapidement, en consultation avec un néonatalogiste d'un centre de soins tertiaires, tout en surveillant de près la température du nouveau-né. D'après les données exemplaires, la mesure optimale consiste à maintenir la température centrale entre 33 °C et 34 °C pendant 72 heures, puis à entamer une période de réchauffement de six à 12 heures. Il faut utiliser des antiépileptiques en présence de convulsions cliniques ou électrographiques. Le maintien des électrolytes et du glucose sériques dans les plages normales et l'évitement de l'hypocapnie, de l'hypercapnie et de l'hyperoxie sont d'importants traitements d'appoint. Il est conseillé de procéder à une imagerie par résonance magnétique (IRM) du cerveau peu après le réchauffement et, lorsque les observations antérieures ne correspondent pas au portrait clinique, de reprendre l'IRM après l'âge de dix jours. Un suivi neurodéveloppemental multidisciplinaire est recommandé.

**Mots-clés :** *Hypoxic-ischemic encephalopathy, therapeutic hypothermia*

### HISTORIQUE

L'encéphalopathie néonatale est un syndrome clinique lié à une perturbation de la fonction neurologique qui se manifeste tôt dans la vie et dont l'incidence est d'environ un à six cas sur 1 000 naissances vivantes (1). L'encéphalopathie hypoxo-ischémique (EHI) représente une proportion importante de nouveau-nés ayant une encéphalopathie. Malgré les progrès des soins périnatals, l'EHI périnatale aiguë modérée à grave chez les nouveau-nés peu prématurés ou à terme demeure une cause importante de mortalité, d'atteinte neurologique aiguë et d'incapacité neurodéveloppementale à long terme (1). En cas d'hypoxie, une perturbation du débit sanguin cérébral est le

principal mécanisme responsable d'une lésion cérébrale après une hypoxo-ischémie *intrapartum*.

À l'échelle cellulaire, l'hypoxo-ischémie entraîne une défaillance énergétique en deux phases. La phase primaire suit la réduction du débit sanguin et de l'irrigation en oxygène et s'associe à une chute de l'adénosine triphosphate (ATP), à une défaillance de la pompe sodium-potassium (Na<sup>+</sup>/K<sup>+</sup>), à une dépolarisation des cellules, à une acidose lactique, à une libération d'acides aminés excitateurs, à la pénétration de calcium dans la cellule et, dans les cas graves, à une nécrose cellulaire (2). La réanimation et la reperfusion sont suivies d'une période de latence de une à six heures pendant laquelle l'atteinte du métabolisme oxydatif

cérébral peut être résorbée, du moins partiellement, avant une défaillance irréversible de la fonction mitochondriale (2). Cette phase de latence représente la fenêtre thérapeutique pour procéder à des interventions neuroprotectrices (2,3).

Le risque d'incapacité et de déficience du développement cognitif dépend de la gravité de l'EHI (4,5). Une légère réduction de la température cérébrale de 2 °C à 4 °C, amorcée dans les six heures suivant la naissance, a été le premier traitement à assurer une neuroprotection chez les nouveau-nés animaux (6). Le mécanisme neuroprotecteur de l'hypothermie thérapeutique est multifactoriel et attribuable à une vaste activité inhibitrice contre divers processus cellulaires nuisibles.

L'EHI est souvent inattendue, et de nombreux nouveau-nés sont d'abord suivis dans un hôpital communautaire. Ainsi, les professionnels qui participent aux soins des nouveau-nés (médecins de famille, obstétriciens, sages-femmes, infirmières, pédiatres communautaires et néonatalogistes) doivent savoir quand le refroidissement peut être bénéfique. Le présent document de principes résume les données probantes à jour sur l'hypothermie thérapeutique pour la neuroprotection des nouveau-nés atteints d'EHI et fournit des conseils thérapeutiques aux cliniciens.

## L'ÉLABORATION DU DOCUMENT DE PRINCIPES

Un bibliothécaire certifié a effectué une recherche dans MEDLINE, y compris les citations en traitement et les autres citations non indexées (1946 au 6 mai 2016), dans Embase (1974 au 6 mai 2016) et le Registre central Cochrane des essais comparatifs (CENTRAL, avril 2016) à l'aide de l'interface OVID (7). Les termes de recherche étaient *hypothermia, induced; hypother\** ou *cooling; hypoxia-ischemia, brain; hypox\** ou *ischem\**; *newborn infant*; et *infan\** ou *newborn* ou *newborn\** ou *neonat\**. Les listes de référence des publications ont été examinées, un total de 1511 références a été extrait, puis les articles intégraux et les rapports Cochrane ont été analysés.

La hiérarchie des données probantes du *Centre for Evidence-Based Medicine* ([www.cebm.net](http://www.cebm.net)) a été appliquée aux publications retenues. Les recommandations s'appuient sur la structure de Shekelle et coll. (8).

## L'HYPOTHERMIE DEVRAIT ELLE ÊTRE OFFERTE SYSTÉMATIQUEMENT AUX NOUVEAU NÉS AYANT UNE EHI?

D'après une analyse systématique et une méta-analyse de 11 essais (englobant 1 505 nouveau-nés) incluant sept études qui prévoyaient un suivi d'au moins 18 mois, l'hypothermie est efficace pour réduire le taux de mortalité ou le retard neurodéveloppemental (RND) modéré à grave entre l'âge de 18 et 24 mois (RR 0,75; IC à 95 %, 0,68 à 0,83), le nombre de sujets à traiter (NST) est de sept (IC à 95 %, 5 à 10) et la survie sans RND est accrue (RR 1,63; IC à 95 %, 1,36 à 1,95)

(9–19). Une autre analyse sur les avantages de l'hypothermie en fonction du degré d'encéphalopathie clinique après une répartition au hasard (cinq essais) a révélé l'intérêt de cette intervention à la fois pour les nouveau-nés ayant une encéphalopathie modérée (RR 0,68; IC à 95 %, 0,56 à 0,84), le NST étant de six (IC à 95 %, 4 à 13) et pour ceux ayant une encéphalopathie grave (RR 0,82; IC à 95 %, 0,72 à 0,93), le NST étant de sept (IC à 95 %, 4 à 17).

L'hypothermie thérapeutique est donc considérée comme la norme de soins pour les nouveau-nés ayant une EHI modérée à grave qui satisfont aux critères d'inclusion. Qualité des preuves : la

## QUELS NOUVEAU-NÉS DEVRAIENT ÊTRE TRAITÉS PAR HYPOTHERMIE?

Le moment où survient la lésion revêt une importance cruciale. L'hypothermie thérapeutique est efficace lors des agressions périnatales aiguës (p. ex., décollement placentaire, prolapsus du cordon) et non lors des agressions anténatales ou chroniques. Selon les données probantes à jour, les nouveau-nés qui tirent avantage de l'hypothermie sont ceux qui sont à terme ou ont au moins 36 semaines d'AG, ont une EHI, sont âgés de six heures ou moins et satisfont aux critères de traitement A ou B et au critère C (20) :

- A. pH du cordon  $\leq 7,0$  ou déficit basique  $\geq -16$ , OU
- B. pH de 7,01 à 7,15 ou déficit basique de  $-10$  à  $-15,9$  sur un gaz du cordon ou un gaz sanguin avant l'âge d'une heure ET
  1. Événement périnatal aigu à l'anamnèse (tels que, sans s'y limiter, un prolapsus du cordon, un décollement placentaire ou une rupture de l'utérus) ET
  2. Indice d'Apgar de  $\leq 5$  à l'âge de dix minutes ou ventilation en pression positive pendant au moins dix minutes
- C. Preuve d'encéphalopathie modérée à grave, démontrée par la présence de convulsions OU d'au moins l'un des signes figurant dans au moins trois des six catégories du [tableau 1](#).

Lorsqu'elle est accessible, une évaluation par électroencéphalographie (ÉEG) à amplitude intégrée (ÉEGa) d'une durée d'au moins 20 minutes peut être utile pour déterminer l'admissibilité du nouveau-né, particulièrement si son encéphalopathie est modérée, afin de confirmer un tracé anormal ou des convulsions. L'ÉEGa normale n'est pas indicatrice d'une imagerie par résonance magnétique (IRM) normale ni d'un pronostic favorable à court terme (21). Le recours à une ÉEG continue (lorsqu'elle est offerte) ou à une ÉEGa dans les 48 heures suivant l'accouchement peut être utile pour déceler des convulsions électriques ou une EHI légère (22). Selon de récentes études rétrospectives, les nouveau-nés ayant une EHI légère peuvent avoir des séquelles, et on pourrait envisager de les mettre en hypothermie thérapeutique (23–25). Les données

**Tableau 1.** Critères de définition de l'encéphalopathie modérée à grave

| Catégorie                      | Encéphalopathie modérée             | Encéphalopathie grave                                                                                              |
|--------------------------------|-------------------------------------|--------------------------------------------------------------------------------------------------------------------|
| 1. <b>Niveau de conscience</b> | Léthargie                           | Stupeur ou coma                                                                                                    |
| 2. <b>Activité spontanée</b>   | Activité réduite                    | Aucune activité                                                                                                    |
| 3. <b>Posture</b>              | Flexion distale, extension complète | Décérébration (bras en extension et en rotation interne, jambes en extension et pieds en flexion plantaire forcée) |
| 4. <b>Tonus</b>                | Hypotonie ( focale, générale)       | Flaccidité                                                                                                         |
| 5. <b>Réflexes archaïques</b>  |                                     |                                                                                                                    |
| Succion                        | Faible                              | Absente                                                                                                            |
| Moro                           | Incomplet                           | Absente                                                                                                            |
| 6. <b>Système autonome</b>     |                                     |                                                                                                                    |
| Pupilles                       | Contractées                         | Dilatation, absence de réactivité à la lumière, disjonction des mouvements du regard                               |
| Fréquence cardiaque            | Bradycardie                         | Variable                                                                                                           |
| Respiration                    | Périodique                          | Apnée                                                                                                              |

sont toutefois insuffisantes pour faire cette recommandation en ce moment.

Tous les nouveau-nés déprimés à la naissance doivent subir une évaluation pour déterminer s'ils respectent les critères A ou B. Si tel est le cas, ils doivent subir un examen neurologique approfondi pour déterminer s'ils respectent le critère C. S'ils satisfont aux critères A et C ou B et C, ils doivent être mis sous hypothermie. Certains cas sont difficiles à classer et requièrent l'avis d'un néonatalogiste en soins tertiaires. Si l'état neurologique du nouveau-né est complètement revenu à la normale pendant la préparation au refroidissement (dans les 30 à 45 minutes suivant la naissance), l'intervention peut être reportée, pourvu que le nouveau-né fasse l'objet d'un suivi attentif et continu afin de déceler toute reprise de l'encéphalopathie. Qualité des preuves : 1a

### CHEZ QUELS NOUVEAU-NÉS DOIT-ON ÉVITER L'HYPOTHERMIE?

Dans la plupart des essais aléatoires et contrôlés sur l'hypothermie thérapeutique, les critères d'exclusion s'établissent comme suit : nouveau-né moribond ou ayant une anomalie congénitale ou génétique majeure pour qui aucun autre traitement vigoureux n'est prévu, ayant un grave retard de croissance intra-utérine, ayant une coagulopathie importante sur le plan clinique ou ayant des manifestations de grave traumatisme crânien ou une hémorragie intracrânienne. L'hémorragie intraventriculaire isolée n'est pas nécessairement une contre-indication absolue, mais ce constat repose sur des données très limitées (26). Malgré le peu de données démontrant les effets bénéfiques du refroidissement initial après l'âge de six heures, l'hypothermie thérapeutique peut tout de même être envisagée, pourvu que les parents soient consultés et informés des avantages incertains de l'intervention et qu'on ait tenu compte de la possibilité d'effets secondaires (p. ex., diathèse hémorragique, hypotension,

hypertension pulmonaire et arythmies cardiaques) (19,27). Il faut discuter des indications et des contre-indications le plus rapidement possible avec un centre de soins tertiaires. Qualité des preuves : 1a

### QUELS SONT LES EFFETS SECONDAIRES DE L'HYPOTHERMIE?

Chez les nouveau-nés qui ont été mis en hypothermie, les essais cliniques font état d'une bradycardie sinusale (fréquence cardiaque de 80 à 100 battements à la minute), d'une hypotension pouvant nécessiter l'administration d'inotropes, d'une thrombopénie légère et d'une hypertension pulmonaire persistante accompagnée d'une déficience de l'oxygénation. L'hypothermie peut également prolonger une hémorragie. Les nouveau-nés ayant une EHI, qu'ils soient mis en hypothermie thérapeutique ou non, sont plus prédisposés aux arythmies, à l'anémie, à la leucopénie, à l'hypoglycémie, à l'hypokaliémie, à la rétention urinaire et à la coagulopathie (11). Les cliniciens qui s'occupent de nouveau-nés ayant une EHI et mis en hypothermie thérapeutique doivent anticiper des complications et assurer un suivi étroit. Une hypotension malgré un soutien inotrope, une hypertension pulmonaire persistante accompagnée d'une hypoxémie malgré un traitement approprié et une coagulopathie importante sur le plan clinique malgré un traitement sont indicateurs d'un arrêt de l'hypothermie et du réchauffement du nouveau-né. La nécrose de la graisse sous-cutanée, avec ou sans hypercalcémie, est une complication rare (28). Il est peu fréquent de devoir arrêter le refroidissement à cause de complications (dans moins de 10 % des cas). Qualité des preuves : 2a

### QUELLE MÉTHODE DOIT-ON UTILISER POUR EFFECTUER L'HYPOTHERMIE?

Deux méthodes de refroidissement sont utilisées dans les essais cliniques : le refroidissement sélectif de la tête et le refroidissement corporel global. Des chercheurs ont comparé

les deux méthodes dans le cadre d'un petit essai clinique monocentrique et n'ont constaté aucune différence entre les nourrissons participants à l'âge de 12 mois (29). Des essais cliniques plus vastes ont donné des résultats similaires à l'égard du taux de décès et d'incapacité, lorsque chacune des méthodes était comparée à un placebo (30).

On peut coiffer le nouveau-né d'un bonnet de refroidissement pour obtenir un refroidissement sélectif de la tête et ainsi maintenir la température fontanelle sous 30 °C. Une température rectale de 34 °C ± 0,5 °C est maintenue par une unité chauffante servocommandée. Ce système est coûteux, exige beaucoup de travail et peut provoquer un œdème du cuir chevelu ou des lésions cutanées, sans compter qu'il est également plus difficile de maintenir la température rectale et que l'accès aux électrodes d'ÉEG est limité. Le refroidissement corporel global à une température rectale de 33,5 °C ± 0,5 °C peut être obtenu grâce au refroidissement passif, à des sacs réfrigérants ou à des couvertures de refroidissement commerciales. Les couvertures de refroidissement servocommandées assurent une température cible plus constante (31).

Le refroidissement corporel global est préconisé parce qu'il est plus facile à préparer et à utiliser, est moins coûteux, donne un meilleur accès à l'ÉEG et est plus accessible. Qualité des preuves : 1b

### À QUEL ENDROIT L'HYPOTHERMIE DOIT-ELLE ÊTRE RÉALISÉE?

L'hypothermie doit être réalisée dans des centres dotés à la fois du personnel possédant le savoir et les compétences sur les subtilités du traitement (y compris le dépistage des complications) et les ressources nécessaires pour traiter non seulement l'insuffisance multiorganique parfois liée à l'EHI, mais également d'autres complications de l'hypothermie au potentiel grave. Les centres qui offrent l'hypothermie doivent avoir accès à l'échographie, à la tomographie et à l'IRM et être en mesure d'effectuer des ÉEG. Les unités néonatales de niveaux 3 et 4 respectent ces exigences. Qualité des preuves : 5

### QUAND LE REFROIDISSEMENT DOIT-IL ÊTRE AMORCÉ?

Chez les nouveau-nés ratons, un délai de 12 heures avant d'entreprendre l'hypothermie accroissait les lésions cérébrales après une hypoxo-ischémie grave, ce qui constitue une préoccupation clinique si les mêmes observations s'appliquent aux nouveau-nés humains (32). En attendant le transport vers une unité de soins tertiaires, il faut fortement envisager le refroidissement passif (p. ex., retrait du bonnet et de la couverture du nouveau-né et fermeture de l'unité chauffante) dans les hôpitaux communautaires après avoir consulté le néonatalogiste de l'hôpital spécialisé. Il faut vérifier la

température rectale du nouveau-né ou, si c'est impossible, sa température axillaire toutes les 15 minutes pour qu'elle ne baisse pas sous les 33 °C.

Plus le refroidissement passif est amorcé rapidement, plus la température ciblée sera atteinte rapidement (33). Il n'est pas recommandé que du personnel non formé utilise des sacs ou des gels réfrigérants, car ils peuvent provoquer une grave hypothermie. Qualité des preuves : 2b

### QUELLE EST LA TEMPÉRATURE CIBLÉE?

La température rectale ou œsophagienne optimale semble être de 33,5 °C ± 0,5 °C pour le refroidissement corporel global et de 34,5 °C ± 0,5 °C pour le refroidissement sélectif de la tête. Dans une étude, le refroidissement à 32,0 °C ne semblait pas donner de meilleurs résultats cliniques (31). Qualité des preuves : 1a

### COMBIEN DE TEMPS L'HYPOTHERMIE DOIT-ELLE ÊTRE MAINTENUE?

Selon des études dérivées de modèles animaux, l'hypothermie est plus efficace lorsqu'elle est effectuée pendant la phase de latence, avant la défaillance secondaire des mécanismes oxydatifs, et qu'elle se poursuit tout au long de la phase secondaire (2). Dans les groupes de traitement de la plupart des essais cliniques, le refroidissement était maintenu 72 heures. Selon une étude récente, un refroidissement plus long (p. ex., 120 heures) n'était pas plus efficace (34). Qualité des preuves : 1a

### COMMENT LE NOUVEAU-NÉ DOIT-IL ÊTRE RÉCHAUFFÉ?

La vitesse du réchauffement demeure controversée. Dans des essais cliniques aléatoires, les nouveau-nés étaient réchauffés sur une période de six à 12 heures (0,5 °C toutes les une à deux heures). La plupart des centres réchauffent les nouveau-nés de 0,5 °C toutes les une à deux heures. On a déjà signalé des convulsions et l'aggravation de l'encéphalopathie clinique pendant le réchauffement (35). Les experts proposent alors de reprendre le refroidissement des nouveau-nés pendant 24 heures, puis de poursuivre par le réchauffement (36). Qualité des preuves : 5

### LES NOUVEAU-NÉS PRÉMATURÉS PEUVENT-ILS ÊTRE MIS EN HYPOTHERMIE?

L'hypothermie s'associe à un taux de mortalité plus élevé chez les nouveau-nés prématurés. Aucune donnée probante ne démontre que l'hypothermie thérapeutique est bénéfique aux nouveau-nés de moins de 35 semaines d'AG. Les données chez les nouveau-nés de moins de 35 semaines se limitent à des rapports de cas, des études de petites cohortes ou des études évaluant le refroidissement pour d'autres affections que l'asphyxie périnatale, telle que l'entérocolite nécrosante (26,37,38). Quelques nouveau-nés d'à peine 35 semaines d'AG ont fait

partie de certains essais cliniques (12,19), et certains centres canadiens l'offrent aux nouveau-nés de 35 semaines d'AG ou plus. Qualité des preuves : 4

### DOIT-ON FOURNIR DES TRAITEMENTS D'APPOINT?

Dans des modèles animaux, l'hypothermie induite provoque un stress physiologique important et s'associe à une élévation prolongée des taux de cortisol circulant après l'asphyxie, ce qui peut accroître la perte neuronale (39,40). Une perfusion d'analgésique, comme la morphine, réduit considérablement les concentrations de cortisol plasmatique et de noradrénaline par rapport à un placebo chez les nouveau-nés sous respirateur (41). Cependant, chez les nouveau-nés humains, les effets de la sédation et de l'analgésie sur les résultats cliniques de l'hypothermie à court et à long terme ne sont pas clairs, et la prudence est donc de mise (3). L'hypothermie prolonge la clairance sérique de la morphine, du fentanyl et du midazolam (42). Dans le cadre d'une étude, des perfusions de morphine à un taux de plus de 10 µg/kg/heure s'associaient à des taux sériques toxiques dans un sous-groupe de nouveau-nés (43). Une perfusion de morphine à faible dose ( $\leq 10$  µg/kg/h) ou d'un opioïde équivalent est recommandée comme approche initiale pour soulager l'inconfort. Qualité des preuves : 3b

De même, il faut utiliser les antiépileptiques avec prudence chez les nouveau-nés ayant une EHI, en raison de leur neurotoxicité démontrée (44). Malgré tout, les experts recommandent de traiter les convulsions néonatales, fréquentes en cas d'EHI et qu'on soupçonne être une cause indépendante de lésion cérébrale (22,45,46). Il faut envisager sérieusement d'obtenir des taux sériques d'antiépileptiques si de nouvelles doses sont nécessaires, particulièrement avant l'âge de 72 heures. Qualité des preuves : 4

Chez les nouveau-nés ayant une EHI qui sont mis en hypothermie, une alimentation entérale précoce minimale (10 à 20 mL/kg/jour) est sécuritaire et faisable pendant les quelques premiers jours suivant la naissance (47). En fait, une hypothermie corporelle globale peut même avoir des effets bénéfiques sur la morbidité gastro-intestinale et la tolérance à l'alimentation (48). Cependant, une alimentation plus que minimale n'est pas aussi sécuritaire, car la perfusion intestinale peut être réduite pendant le refroidissement (49).

D'autres stratégies de prise en charge optimisent les résultats cliniques : réduire au minimum les fluctuations de dioxyde de carbone du sang, éviter l'hyperoxie, assurer une bonne perfusion des tissus à l'aide de vasopresseurs ou d'inotropes, maintenir une glycémie normale, traiter l'hyperbilirubinémie et maintenir la stimulation et les manipulations au minimum (50–53).

L'efficacité neuroprotectrice de divers agents (allopurinol, xénon, mélatonine, érythropoïétine, cellules souches neurales et sulfate de magnésium) combinés à l'hypothermie a suscité

beaucoup d'intérêt et de recherches qui se poursuivent (54–60), mais les données sont insuffisantes pour en recommander l'usage actuellement.

### QUEL EST LE MOMENT OPTIMAL POUR PROCÉDER À L'IMAGERIE CÉRÉBRALE?

L'IRM est le mode d'imagerie cérébrale favorisé chez les nouveau-nés atteints d'encéphalopathie néonatale (61). Des recherches sur le rôle prédictif de l'échographie et de la spectroscopie proche infrarouge sont en cours. Avant que le refroidissement ne devienne un traitement, la période entre l'âge de trois et cinq jours représentait la meilleure fenêtre pour procéder à l'IRM pondérée en diffusion, à la fois pour obtenir un pronostic et pour évaluer la possibilité de réorienter les soins cliniques (62). D'après quelques études de cohortes sur la corrélation entre les observations à l'IRM à divers âges et le pronostic clinique, chez les nouveau-nés qui sont mis en hypothermie thérapeutique, une IRM effectuée entre l'âge de deux et quatre jours permet de diagnostiquer correctement les lésions à la séquence pondérée en diffusion observées après l'âge de dix jours aux séquences T1 et T2 (63,64).

Il est difficile d'effectuer une IRM chez un nouveau-né en refroidissement actif puisqu'il faut maintenir une température stable et que le matériel de thermorégulation doit être compatible avec l'IRM. En l'absence d'incubateur compatible avec l'IRM et d'autre matériel spécialisé, il est recommandé d'effectuer une IRM après le réchauffement, à l'âge de quatre ou cinq jours. D'ordinaire, l'imagerie peut être effectuée lorsque le nouveau-né est emmaillotté et qu'il vient d'être nourri, ce qui permet d'éviter l'anesthésie générale. Les centres devraient tenter d'effectuer ce type d'IRM au même âge chez tous leurs patients, afin d'accroître les compétences locales de lecture et d'interprétation des résultats. Il faut envisager de reprendre l'IRM entre l'âge de dix et 14 jours lorsque l'imagerie et les caractéristiques cliniques ne concordent pas ou que le diagnostic demeure ambigu (65). Qualité des preuves : 3

### QUEL SUIVI DOIT-ON PRÉVOIR POUR LES NOUVEAU-NÉS QUI ONT ÉTÉ MIS EN HYPOTHERMIE?

Plus de 30 % des nouveau-nés ayant présenté une EHI souffrent de paralysie cérébrale ou d'une grave incapacité, et ces affections sont plus courantes chez ceux qui ont une grave encéphalopathie (66). On convient de plus en plus que des déficits cognitifs peuvent être importants même en l'absence de paralysie cérébrale (67). Jusqu'à 25 % des enfants présentent une grave atteinte visuelle ou une cécité après une encéphalopathie modérée à grave, particulièrement en cas d'hypoglycémie. Une diminution de l'acuité visuelle ou du champ visuel ou une atteinte de la stéréopsie ont également été signalées (68). Une surdité de perception, probablement secondaire à une lésion du tronc cérébral

touche jusqu'à 18 % des survivants à une encéphalopathie modérée sans paralysie cérébrale (69). De 30 % à 50 % des enfants qui survivent à une EHI modérée présentent des déficits cognitifs, particulièrement des troubles de lecture, d'orthographe et d'arithmétique (70). Il faut également envisager des problèmes de comportement, tels que l'hyperactivité et les troubles affectifs, même lorsque les survivants n'ont pas d'incapacité motrice (71). Treize pour cent des nouveau-nés qui ont survécu à une EHI modérée à grave après une hypothermie thérapeutique font de l'épilepsie infantile, et 7 % doivent prendre des antiépileptiques à l'âge scolaire (72).

Le suivi à l'âge de 18 à 24 mois est la norme des soins lors des essais sur l'hypothermie. Cependant, compte tenu du large spectre d'atteinte neurodéveloppementale après une encéphalopathie cérébrale hypoxo-ischémique et de l'hétérogénéité entre les cas, il est important d'assurer un suivi étroit tout au long de la petite enfance et de l'enfance. Un néonatalogiste ou un pédiatre, une infirmière, des spécialistes en physiothérapie, en ergothérapie, en psychologie, en développement du nourrisson, en neurologie, en pédiatrie du développement, en ophtalmologie ou en audiologie peuvent participer au suivi multidisciplinaire. La collaboration entre spécialistes pour évaluer le pronostic moteur, psychoéducatif, auditif et cognitif à long terme est un élément important des soins aux nourrissons qui ont été mis en hypothermie thérapeutique. Qualité des preuves : 2b

## CONCLUSION

Une hypothermie thérapeutique légère à une température rectale de  $33,5\text{ °C} \pm 0,5\text{ °C}$ , amorcée le plus tôt possible avant l'âge de six heures, réduit le taux de mortalité ou de graves incapacités neurodéveloppementales à long terme chez les nouveau-nés ayant une EHI modérée à grave, sans accroître l'incidence d'incapacité chez les survivants. L'hypothermie thérapeutique doit être offerte dans des unités néonatales de soins tertiaires et être entreprise en consultation avec un néonatalogiste de niveau 3 avant le transport. Compte tenu du risque de complications de l'EHI et du refroidissement, une surveillance étroite des nouveau-nés s'impose pendant le refroidissement. Un suivi multidisciplinaire à long terme des survivants pour évaluer et traiter la fonction neurocognitive est essentiel à la qualité des soins.

## SOMMAIRE DES RECOMMANDATIONS

- Les nouveau-nés de 36 semaines d'âge gestationnel (AG) ou plus ayant une encéphalopathie hypoxo-ischémique (EHI) modérée à grave qui respectent les critères d'inclusion doivent être mis en hypothermie thérapeutique. Niveau de recommandation A
- Il faut envisager l'hypothermie thérapeutique chez les nouveau-nés de 35 semaines d'âge gestationnel (AG) ou

plus ayant une EHI modérée à grave qui respectent les autres critères d'inclusion. Niveau de recommandation B

- L'hypothermie thérapeutique est à éviter chez les patients suivants : nouveau-né moribond ou ayant une anomalie congénitale ou génétique majeure pour qui aucun autre traitement vigoureux n'est prévu, ayant un grave retard de croissance intra-utérine, ayant une coagulopathie importante sur le plan clinique ou ayant des manifestations de grave traumatisme crânien ou une hémorragie intracrânienne. Niveau de recommandation A
- Les médecins communautaires qui soignent des nouveau-nés chez qui ils soupçonnent une EHI et pour qui ils envisagent une hypothermie thérapeutique devraient consulter un néonatalogiste pour amorcer un refroidissement passif le plus vite possible après la naissance. Tous les nouveau-nés qui ont besoin d'une hypothermie thérapeutique doivent être transférés dans une unité de soins intensifs néonataux de soins tertiaires disposant des compétences et des ressources appropriées. Niveau de recommandation D
- Le refroidissement sélectif de la tête et le refroidissement corporel global sont tous deux efficaces. Le refroidissement corporel global est plus facile à préparer et à utiliser, est moins coûteux et permet d'effectuer des EEG. Il est donc recommandé dans les centres qui n'utilisent pas déjà le refroidissement sélectif de la tête. Niveau de recommandation B
- Il faut poursuivre l'hypothermie thérapeutique pendant 72 heures et viser une température rectale (ou œsophagienne) de  $33\text{ °C}$  à  $34\text{ °C}$  pour le refroidissement corporel global, ou de  $34\text{ °C}$  à  $35\text{ °C}$  pour le refroidissement sélectif de la tête. Le réchauffement doit durer de six à 12 heures ( $0,5\text{ °C}$  toutes les une à deux heures). Niveau de recommandation A
- L'hypothermie thérapeutique n'est pas recommandée chez les nouveau-nés de moins de 35 semaines d'AG. Niveau de recommandation C
- Il est recommandé de traiter la douleur ou l'inconfort à l'aide d'une faible dose d'opioïde pendant le refroidissement. Niveau de recommandation B
- Il est recommandé de traiter les convulsions malgré les connaissances limitées sur les effets secondaires des antiépileptiques, car les avantages sont probablement supérieurs aux risques. Niveau de recommandation D
- Il est recommandé de suivre les nourrissons qui ont été mis en hypothermie dans une clinique de suivi néonatal jusqu'à l'âge d'au moins deux ans, mais idéalement jusqu'à l'âge scolaire. Ce suivi doit être assuré conjointement avec les soins d'un pédiatre communautaire. Niveau de recommandation B

## Remerciements

Le comité de la pédiatrie communautaire et le comité des soins aigus de la Société canadienne de pédiatrie ont révisé le présent document de principes.

## Références

- Ferriero DM. Neonatal brain injury. *N Engl J Med* 2004;351(19):1985–95.
- Drury PP, Gunn ER, Bennet L, Gunn AJ. Mechanisms of hypothermic neuroprotection. *Clin Perinatol* 2014;41(1):161–75.
- Wassink G, Lear CA, Gunn KC, Dean JM, Bennet L, Gunn AJ. Analgesics, sedatives, anticonvulsant drugs, and the cooled brain. *Semin Fetal Neonatal Med* 2015;20(2):109–14.
- Rutherford M, Ramenghi LA, Edwards AD et coll. Assessment of brain tissue injury after moderate hypothermia in neonates with hypoxic-ischaemic encephalopathy: A nested substudy of a randomised controlled trial. *Lancet Neurol* 2010;9(1):39–45.
- Barkovich AJ, Hajnal BL, Vigneron D et coll. Prediction of neuromotor outcome in perinatal asphyxia: Evaluation of MR scoring systems. *AJNR Am J Neuroradiol* 1998;19(1):143–9.
- Gunn AJ, Gunn TR, Gunning MI, Williams CE, Gluckman PD. Neuroprotection with prolonged head cooling started before postischemic seizures in fetal sheep. *Pediatrics* 1998;102(5):1098–106.
- McGowan L, Sampson M, Salzwedel DM, Cogo E, Foerster V, Lefebvre C. PRESS peer review of electronic search strategies: 2015 guideline statement. *J Clin Epidemiol* 2016;75:40–6.
- Shekelle PG, Woolf SH, Eccles M, Grimshaw J. Developing clinical guidelines. *West J Med* 1999;170(6):348–51.
- Jacobs SE, Berg M, Hunt R, Tarnow-Mordi WO, Inder TE, Davis PG. Cooling for newborns with hypoxic ischaemic encephalopathy. *Cochrane Database Syst Rev* 2013;1:CD003311.
- Azzopardi DV, Strohm B, Edwards AD et coll; TOBY Study Group. Moderate hypothermia to treat perinatal asphyxial encephalopathy. *N Engl J Med* 2009;361(14):1349–58.
- Gluckman PD, Wyatt JS, Azzopardi DV et coll. Selective head cooling with mild systemic hypothermia after neonatal encephalopathy: Multicentre randomised trial. *Lancet* 2005;365(9460):663–70.
- Eicher DJ, Wagner CL, Katikaneni LP et coll. Moderate hypothermia in neonatal encephalopathy: Efficacy outcomes. *Pediatr Neurol* 2005;32(1):11–7.
- Shankaran S, Laptook AR, Ehrenkranz RA et coll; National Institute of Child Health and Human Development Neonatal Research Network. Whole-body hypothermia for neonates with hypoxic-ischemic encephalopathy. *N Engl J Med* 2005;353(15):1574–84.
- Simbruner G, Mittal RA, Rohlfmann F, Mueche R; neoNEURO.network Trial Participants. Systemic hypothermia after neonatal encephalopathy: Outcomes of neoNEURO.network RCT. *Pediatrics* 2010;126(4):e771–8.
- Zhou WH, Cheng GQ, Shao XM et coll; China Study Group. Selective head cooling with mild systemic hypothermia after neonatal hypoxic-ischemic encephalopathy: A multicenter randomized controlled trial in China. *J Pediatr* 2010;157(3):367–72, 372.e1–3.
- Akisu M, Huseyinov A, Yalaz M, Cetin H, Kultursay N. Selective head cooling with hypothermia suppresses the generation of platelet-activating factor in cerebrospinal fluid of newborn infants with perinatal asphyxia. *Prostaglandins Leukot Essent Fatty Acids* 2003;69(1):45–50.
- Shankaran S, Laptook A, Wright LL et coll. Whole-body hypothermia for neonatal encephalopathy: Animal observations as a basis for a randomized, controlled pilot study in term infants. *Pediatrics* 2002;110(2 Pt 1):377–85.
- Lin ZL, Yu HM, Lin J, Chen SQ, Liang ZQ, Zhang ZY. Mild hypothermia via selective head cooling as neuroprotective therapy in term neonates with perinatal asphyxia: An experience from a single neonatal intensive care unit. *J Perinatol* 2006;26(3):180–4.
- Jacobs SE, Morley CJ, Inder TE et coll; Infant Cooling Evaluation Collaboration. Whole-body hypothermia for term and near-term newborns with hypoxic-ischemic encephalopathy: A randomized controlled trial. *Arch Pediatr Adolesc Med* 2011;165(8):692–700.
- American Academy of Pediatrics. Committee on Fetus and Newborn; Papile LA, Baley JE et coll. Hypothermia and neonatal encephalopathy. *Pediatrics* 2014;133(6):1146–50.
- Sarkar S, Barks JD, Donn SM. Should amplitude-integrated electroencephalography be used to identify infants suitable for hypothermic neuroprotection? *J Perinatol* 2008;28(2):117–22.
- Glass HC, Wusthoff CJ, Shellhaas RA et coll. Risk factors for EEG seizures in neonates treated with hypothermia: A multicenter cohort study. *Neurology* 2014;82(14):1239–44.
- Murray DM, O'Connor CM, Ryan CA, Korotchikova I, Boylan GB. Early EEG grade and outcome at 5 years after mild neonatal hypoxic ischemic encephalopathy. *Pediatrics* 2016;138(4):pii:e20160659.
- Gagné-Loranger M, Sheppard M, Ali N, Saint-Martin C, Wintermark P. Newborns referred for therapeutic hypothermia: Association between initial degree of encephalopathy and severity of brain injury (what about the newborns with mild encephalopathy on admission?). *Am J Perinatol* 2016;33(2):195–202.
- Walsh BH, Neil J, Morey J et coll. The frequency and severity of magnetic resonance imaging abnormalities in infants with mild neonatal encephalopathy. *J Pediatr* 2017;187:26–33.e1.
- Smit E, Liu X, Jary S, Cowan F, Thoresen M. Cooling neonates who do not fulfil the standard cooling criteria—short- and long-term outcomes. *Acta Paediatr* 2015;104(2):138–45.
- Li T, Xu F, Cheng X et coll. Systemic hypothermia induced within 10 hours after birth improved neurological outcome in newborns with hypoxic-ischemic encephalopathy. *Hosp Pract (1995)* 2009;37(1):147–52.
- Strohm B, Hobson A, Brocklehurst P, Edwards AD, Azzopardi D; UK TOBY Cooling Register. Subcutaneous fat necrosis after moderate therapeutic hypothermia in neonates. *Pediatrics* 2011;128(2):e450–2.
- Celik Y, Atci A, Gulasi S, Okuyaz C, Makharoblidze K, Sungur MA. Comparison of selective head cooling versus whole-body cooling. *Pediatr Int* 2016;58(1):27–33.
- Tagin MA, Woolcott CG, Vincer MJ, Whyte RK, Stinson DA. Hypothermia for neonatal hypoxic ischemic encephalopathy: An updated systematic review and meta-analysis. *Arch Pediatr Adolesc Med* 2012;166(6):558–66.
- Akula VP, Joe P, Thusu K et coll. A randomized clinical trial of therapeutic hypothermia mode during transport for neonatal encephalopathy. *J Pediatr* 2015;166(4):856–61. e1–2.
- Sabir H, Scull-Brown E, Liu X, Thoresen M. Immediate hypothermia is not neuroprotective after severe hypoxia-ischemia and is deleterious when delayed by 12 hours in neonatal rats. *Stroke* 2012;43(12):3364–70.
- Lemyre B, Ly L, Chau V et coll. Initiation of passive cooling at referring centre is most predictive of achieving early therapeutic hypothermia in asphyxiated newborns. *Pediatr Child Health* 2017;22(5):264–8.
- Shankaran S, Laptook AR, Pappas A et coll; Eunice Kennedy Shriver National Institute of Child Health and Human Development Neonatal Research Network. Effect of depth and duration of cooling on deaths in the NICU among neonates with hypoxic ischemic encephalopathy: A randomized clinical trial. *JAMA* 2014;312(24):2629–39.
- Battin M, Bennet L, Gunn AJ. Rebound seizures during rewarming. *Pediatrics* 2004;114(5):1369.
- Kendall GS, Mathieson S, Meek J, Rennie JM. Recooling for rebound seizures after rewarming in neonatal encephalopathy. *Pediatrics* 2012;130(2):e451–5.
- Laura F, Mori A, Tataranno ML et coll. Therapeutic hypothermia in a late preterm infant. *J Matern Fetal Neonatal Med* 2012;25 Suppl 1:125–7.
- Hall NJ, Eaton S, Peters MJ et coll. Mild controlled hypothermia in preterm neonates with advanced necrotizing enterocolitis. *Pediatrics* 2010;125(2):e300–8.
- Davidson JO, Fraser M, Naylor AS, Roelfsema V, Gunn AJ, Bennet L. Effect of cerebral hypothermia on cortisol and adrenocorticotropic hormone responses after umbilical cord occlusion in preterm fetal sheep. *Pediatr Res* 2008;63(1):51–5.
- Koome ME, Davidson JO, Drury PP et coll. Antenatal dexamethasone after asphyxia increases neural injury in preterm fetal sheep. *PLOS One* 2013;8(10):e77480.
- Simons SH, van Dijk M, van Lingen RA et coll. Randomised controlled trial evaluating effects of morphine on plasma adrenaline/noradrenaline concentrations in newborns. *Arch Dis Child Fetal Neonatal Ed* 2005;90(1):F36–40.
- Zanelli S, Buck M, Fairchild K. Physiologic and pharmacologic considerations for hypothermia therapy in neonates. *J Perinatol* 2011;31(6):377–86.
- Róka A, Melinda KT, Vársárhelyi B, Machay T, Azzopardi D, Szabó M. Elevated morphine concentrations in neonates treated with morphine and prolonged hypothermia for hypoxic ischemic encephalopathy. *Pediatrics* 2008;121(4):e844–9.
- Shetty J. Neonatal seizures in hypoxic-ischaemic encephalopathy—risks and benefits of anticonvulsant therapy. *Dev Med Child Neurol* 2015;57 Suppl 3:40–3.
- Glass HC, Nash KB, Bonifacio SL et coll. Seizures and magnetic resonance imaging-detected brain injury in newborns cooled for hypoxic-ischemic encephalopathy. *J Pediatr* 2011;159(5):731–5. e1.
- Shah DK, Wusthoff CJ, Clarke P et coll. Electrographic seizures are associated with brain injury in newborns undergoing therapeutic hypothermia. *Arch Dis Child Fetal Neonatal Ed* 2014;99(3):F219–24.
- Thyagarajan B, Tillqvist E, Baral V, Hallberg B, Vollmer B, Blennow M. Minimal enteral nutrition during neonatal hypothermia treatment for perinatal hypoxic-ischaemic encephalopathy is safe and feasible. *Acta Paediatr* 2015;104(2):146–51.
- Thornton KM, Dai H, Septer S, Petrikin JE. Effects of whole body therapeutic hypothermia on gastrointestinal morbidity and feeding tolerance in infants with hypoxic ischemic encephalopathy. *Int J Pediatr* 2014;2014:643689.
- Faingold R, Cassia G, Prempong C, Morneau L, Sant'Anna GM. Intestinal ultrasonography in infants with moderate or severe hypoxic-ischemic encephalopathy receiving hypothermia. *Pediatr Radiol* 2016;46(1):87–95.
- Hansen G, Al Shafouri N, Narvey M, Vallance JK, Srinivasan G. High blood carbon dioxide variability and adverse outcomes in neonatal hypoxic ischemic encephalopathy. *J Matern Fetal Neonatal Med* 2016;29(4):680–3.

51. Wong DS, Poskitt KJ, Chau V et coll. Brain injury patterns in hypoglycemia in neonatal encephalopathy. *Am J Neuroradiol* 2013;34(7):1456–61.
52. Al Shafouri N, Narvey M, Srinivasan G, Vallance J, Hansen G. High glucose variability is associated with poor neurodevelopmental outcomes in neonatal hypoxic ischemic encephalopathy. *J Neonatal Perinatal Med* 2015;8(2):119–24.
53. Kapadia VS, Chalak LF, DuPont TL, Rollins NK, Brion LP, Wyckoff MH. Perinatal asphyxia with hyperoxemia within the first hour of life is associated with moderate to severe hypoxic-ischemic encephalopathy. *J Pediatr* 2013;163(4):949–54.
54. Carloni S, Perrone S, Buonocore G, Longini M, Proietti F, Balduini W. Melatonin protects from the long-term consequences of a neonatal hypoxic-ischemic brain injury in rats. *J Pineal Res* 2008;44(2):157–64.
55. Benders MJ, Bos AF, Rademaker CM et coll. Early postnatal allopurinol does not improve short term outcome after severe birth asphyxia. *Arch Dis Child Fetal Neonatal Ed* 2006;91(3):F163–5.
56. Ma D, Hossain M, Chow A et coll. Xenon and hypothermia combine to provide neuroprotection from neonatal asphyxia. *Ann Neurol* 2005;58(2):182–93.
57. Zhu C, Kang W, Xu F et coll. Erythropoietin improved neurologic outcomes in newborns with hypoxic-ischemic encephalopathy. *Pediatrics* 2009;124(2):e218–26.
58. Wu YW, Bauer LA, Ballard RA et coll. Erythropoietin for neuroprotection in neonatal encephalopathy: Safety and pharmacokinetics. *Pediatrics* 2012;130(4):683–91.
59. Mueller FJ, Seroby N, Schraufstatter IU et coll. Adhesive interactions between human neural stem cells and inflamed human vascular endothelium are mediated by integrins. *Stem Cells* 2006;24(11):2367–72.
60. Greenwood K, Cox P, Mehmet H et coll. Magnesium sulfate treatment after transient hypoxia-ischemia in the newborn piglet does not protect against cerebral damage. *Pediatr Res* 2000;48(3):346–50.
61. Chau V, Poskitt KJ, Dunham CP, Henderson G, Miller SP. Magnetic resonance imaging in the encephalopathic term newborn. *Curr Pediatr Rev* 2014;10(1):28–36.
62. McKinstry RC, Miller JH, Snyder AZ et coll. A prospective, longitudinal diffusion tensor imaging study of brain injury in newborns. *Neurology* 2002;59(6):824–33.
63. Charon V, Proisy M, Ferré JC et coll. Comparison of early and late MRI in neonatal hypoxic-ischemic encephalopathy using three assessment methods. *Pediatr Radiol* 2015;45(13):1988–2000.
64. Wintermark P, Hansen A, Soul J, Labrecque M, Robertson RL, Warfield SK. Early versus late MRI in asphyxiated newborns treated with hypothermia. *Arch Dis Child Fetal Neonatal Ed* 2011;96(1):F36–44.
65. Chakkarapani E, Poskitt KJ, Miller SP et coll. Reliability of early magnetic resonance imaging (MRI) and necessity of repeating MRI in noncooled and cooled infants with neonatal encephalopathy. *J Child Neurol* 2016;31(5):553–9.
66. Barnett A, Mercuri E, Rutherford M et coll. Neurological and perceptual-motor outcome at 5–6 years of age in children with neonatal encephalopathy: Relationship with neonatal brain MRI. *Neuropediatrics* 2002;33(5):242–8.
67. Gonzalez FF, Miller SP. Does perinatal asphyxia impair cognitive function without cerebral palsy? *Arch Dis Child Fetal Neonatal Ed* 2006;91(6):F454–9.
68. Mercuri E, Atkinson J, Braddick O et coll. Basal ganglia damage and impaired visual function in the newborn infant. *Arch Dis Child Fetal Neonatal Ed* 1997;77(2):F111–4.
69. Lindström K, Lagerroos P, Gillberg C, Fernell E. Teenage outcome after being born at term with moderate neonatal encephalopathy. *Pediatr Neurol* 2006;35(4):268–74.
70. Dilenge ME, Majnemer A, Shevell MI. Long-term developmental outcome of asphyxiated term neonates. *J Child Neurol* 2001;16(11):781–92.
71. Marlow N, Rose AS, Rands CE, Draper ES. Neuropsychological and educational problems at school age associated with neonatal encephalopathy. *Arch Dis Child Fetal Neonatal Ed* 2005;90(5):F380–7.
72. Liu X, Jary S, Cowan F, Thoresen M. Reduced infancy and childhood epilepsy following hypothermia-treated neonatal encephalopathy. *Epilepsia* 2017;58(11):1902–11.

#### COMITÉ D'ÉTUDE DU FŒTUS ET DU NOUVEAU-NÉ DE LA SCP

**Membres :** Mireille Guillot MD, Leonora Hendson MD, Ann Jefferies MD (présidente sortante), Thierry Lacaze-Masmonteil MD (président), Brigitte Lemyre MD, Michael Narvey MD, Leigh Anne Allwood Newhook MD (représentante du conseil), Vibhuti Shah MD

**Représentants :** Radha Chari MD, La Société des obstétriciens et gynécologues du Canada; William Ehman MD, Le Collège des médecins de famille du Canada; Roxanne Laforge inf, Partenariat des programmes périnataux du Canada; Chantal Nelson Ph. D., Agence de la santé publique du Canada; Eugene H Ng MD, section de la médecine néonatale et périnatale de la SCP; Doris Sawatzky-Dickson inf, Association canadienne des infirmières et infirmiers en néonatalogie; Kristi Watterberg MD, comité d'étude du fœtus et du nouveau-né, American Academy of Pediatrics

**Auteurs principaux :** Brigitte Lemyre MD, Vann Chau MD
